# Supplementary material
Source: Elsevier journal article supplement (https://www.sciencedirect.com/science/article/pii/S0213911118301638)
Supplement: mmc1 [file S0213911118301638:mmc1.docx]

**Apéndice**

**Fases, objetivos y metodología del proyecto AdaptA GPS (Adapta y Aplica Guías de Promoción de la Salud) sobre la Guía NICE NG44**

| **Fases** | **Objetivos** | **Metodología** |
| --- | --- | --- |
| Traducción literal y revisión crítica  (tarea 1) | Revisión crítica de la traducción al español de la Guía NICE en cuanto a su aplicabilidad al contexto español | Traducción literal por traductora profesional, lectura crítica por parte de los nodos para identificar términos dudosos y no aplicables al contexto español, puesta en común durante el primer encuentro presencial |
| Revisión sistemática | Identificación de publicaciones en revistas científicas sobre participación comunitaria en salud en España | Búsqueda sistemática en cuatro bases de datos, con estrategia de búsqueda adaptada a partir de la utilizada para las revisiones que apoyan la Guía NICE (estrategia disponible previa solicitud a los autores). Selección de los artículos según los criterios de participación por lo menos en cuanto a decisión-acción conjunta y con participación, al menos, en dos etapas de la planificación de la intervención |
| Revisión de literatura gris  (tarea 2) | Identificación de literatura gris sobre participación comunitaria por parte de cada nodo de cada una de las comunidades autónomas participantes en el proyecto | Identificación de literatura gris sobre efectividad de la participación en mejorar la salud y el bienestar, o sobre procesos efectivos para promover la participación comunitaria en cada comunidad autónoma participante, a través de búsqueda en bases de datos de literatura gris, de tesis doctorales y en sociedades federadas de cada comunidad autónoma.  Tras la identificación por parte de cada nodo, el equipo coordinador seleccionó aquellas publicaciones que cumplían los criterios de participación por lo menos en cuanto a decisión-acción conjunta y con participación, al menos, en dos etapas de la planificación de la intervención |
| Contextualización  (tarea 3) | Recopilación de información sobre el contexto de la participación comunitaria en salud en las comunidades autónomas adheridas al proyecto | Las personas miembros de cada nodo informaron sobre los siguientes temas:   - Contextos normativos y órganos formales e informales de cada comunidad autónoma sobre promoción de la participación comunitaria en salud - Percepción sobre el funcionamiento de estos órganos y estas normativas, y su grado de participación real - Niveles de participación comunitaria que se hayan alcanzado en su contexto y en qué fases la población suele participar más - Identificación de actores clave a los que dirigir la guía adaptada - Formación en participación comunitaria en su contexto |
| Reelaboración de las recomendaciones  (primer encuentro presencial) | Reelaboración de las recomendaciones teniendo en cuenta los resultados de la revisión sistemática y de las tareas 1, 2 y 3 | Encuentro presencial con los coordinadores del proyecto y los coordinadores de cada nodo para la puesta en común de los resultados y la reelaboración de las recomendaciones adaptadas al contexto español |
| Pilotaje  (tarea 4) | Pilotaje de las recomendaciones de la Guía NICE adaptadas | Entrevistas grupales con tres grupos de personas relacionadas con un proyecto local activo de participación comunitaria: un grupo de directivos, otro de técnicos y otro con la ciudadanía. Las entrevistas estaban enfocadas en dos áreas: la primera, identificar si las recomendaciones eran aplicables al contexto español, y la segunda, si esas recomendaciones se estaban llevando a cabo en el proyecto seleccionado de su comunidad autónoma |
| Elaboración final de la guía adaptada  (segundo encuentro presencial) | Elaboración final de las recomendaciones y escritura de los otros apartados de la guía | El equipo de coordinación elaboró una propuesta de borrador de los contenidos finales de la guía, que fueron comentados en cada nodo y consensuados y finalizados durante el segundo encuentro presencial |
